# Supplementary material for: Effect of sodium silicate on drinking water biofilm development
Source: Royal Society of Chemistry journal article supplement (doi:10.1039/d1ew00682g), 2022-01-01
Supplement: d1ew00682g1.pdf [file d1ew00682g1.pdf]

1 **Supplementary information for: *Effect of sodium silicate on***  
2 ***drinking water biofilm development***

3 This document contains 6 figures, 2 tables, and 12 pages.

4 **Pilot-scale model distribution system**

5 **General water quality**

6 Figure 1 summarizes free chlorine, pH, phosphate residual, silica residual, and TOC,  
7 while Figure 2 summarizes aluminum, true colour, iron, manganese, total nitrogen,  
8 turbidity, and UV<sub>254</sub>. Both figures represent samples collected from the influent and  
9 effluent of each AR.

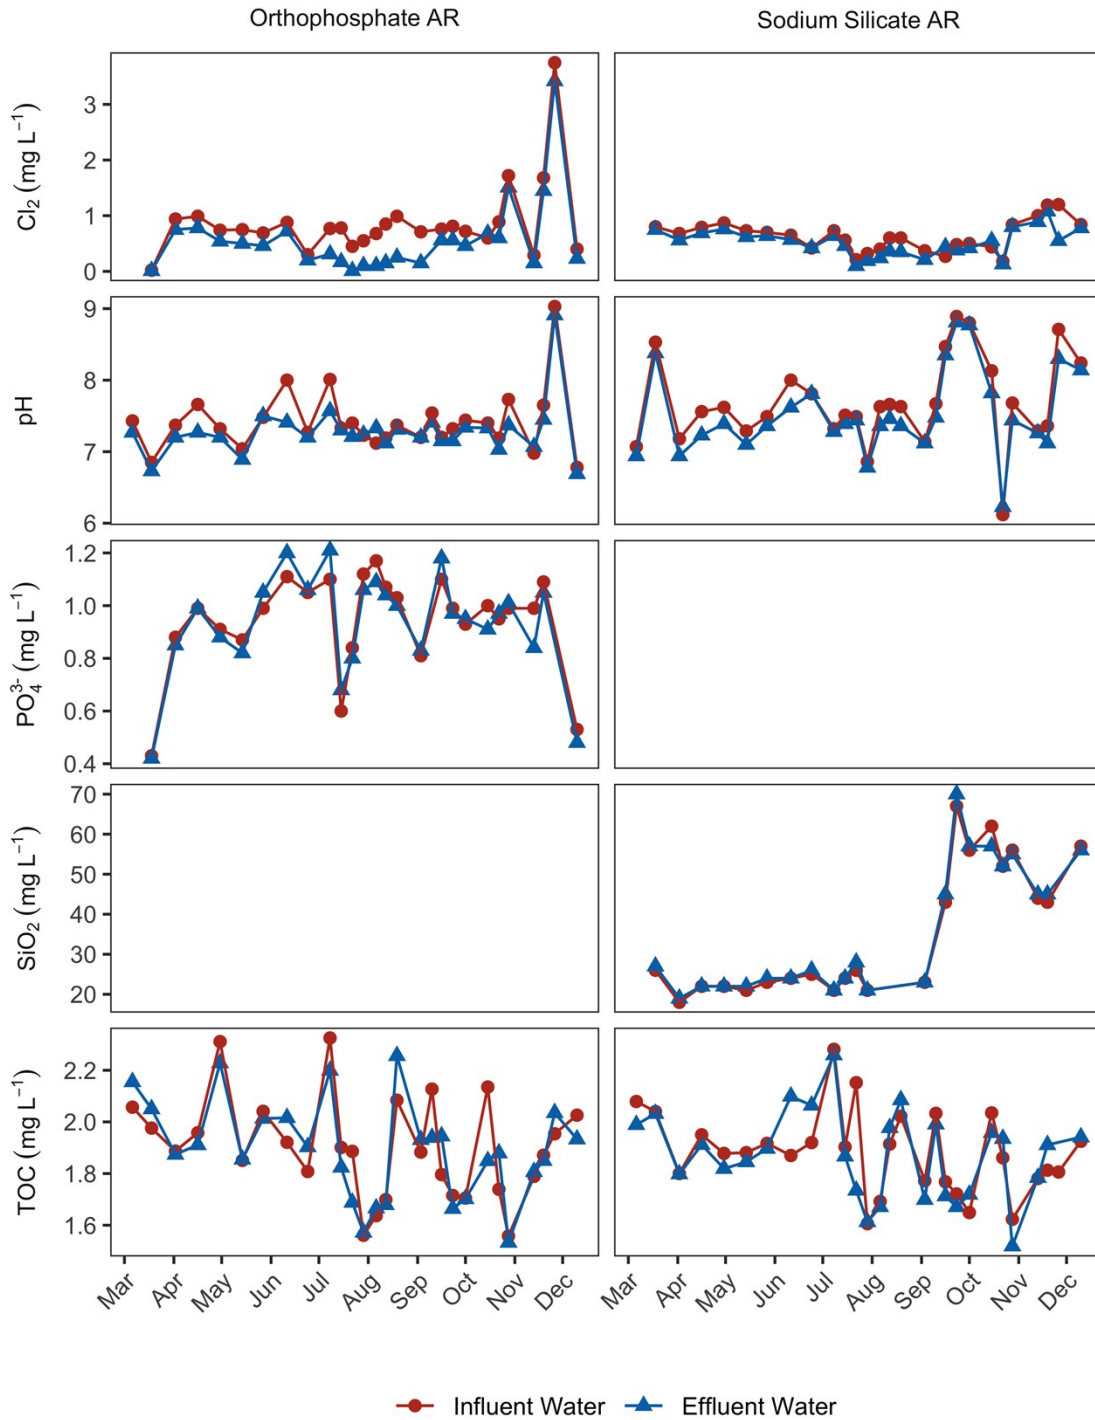

10

11 *Figure 1: Free chlorine, pH, phosphate residual, silica residual, and TOC measured in*  
 12 *the influent (reservoir) and effluent water of each AR. The drop in pH in the*  
 13 *influent/effluent of the silicate-treated AR represents an overcorrection (pH was*  
 14 *adjusted in an attempt to maintain a stable target pH of 7.4 after doubling the sodium*  
 15 *silicate dose).*

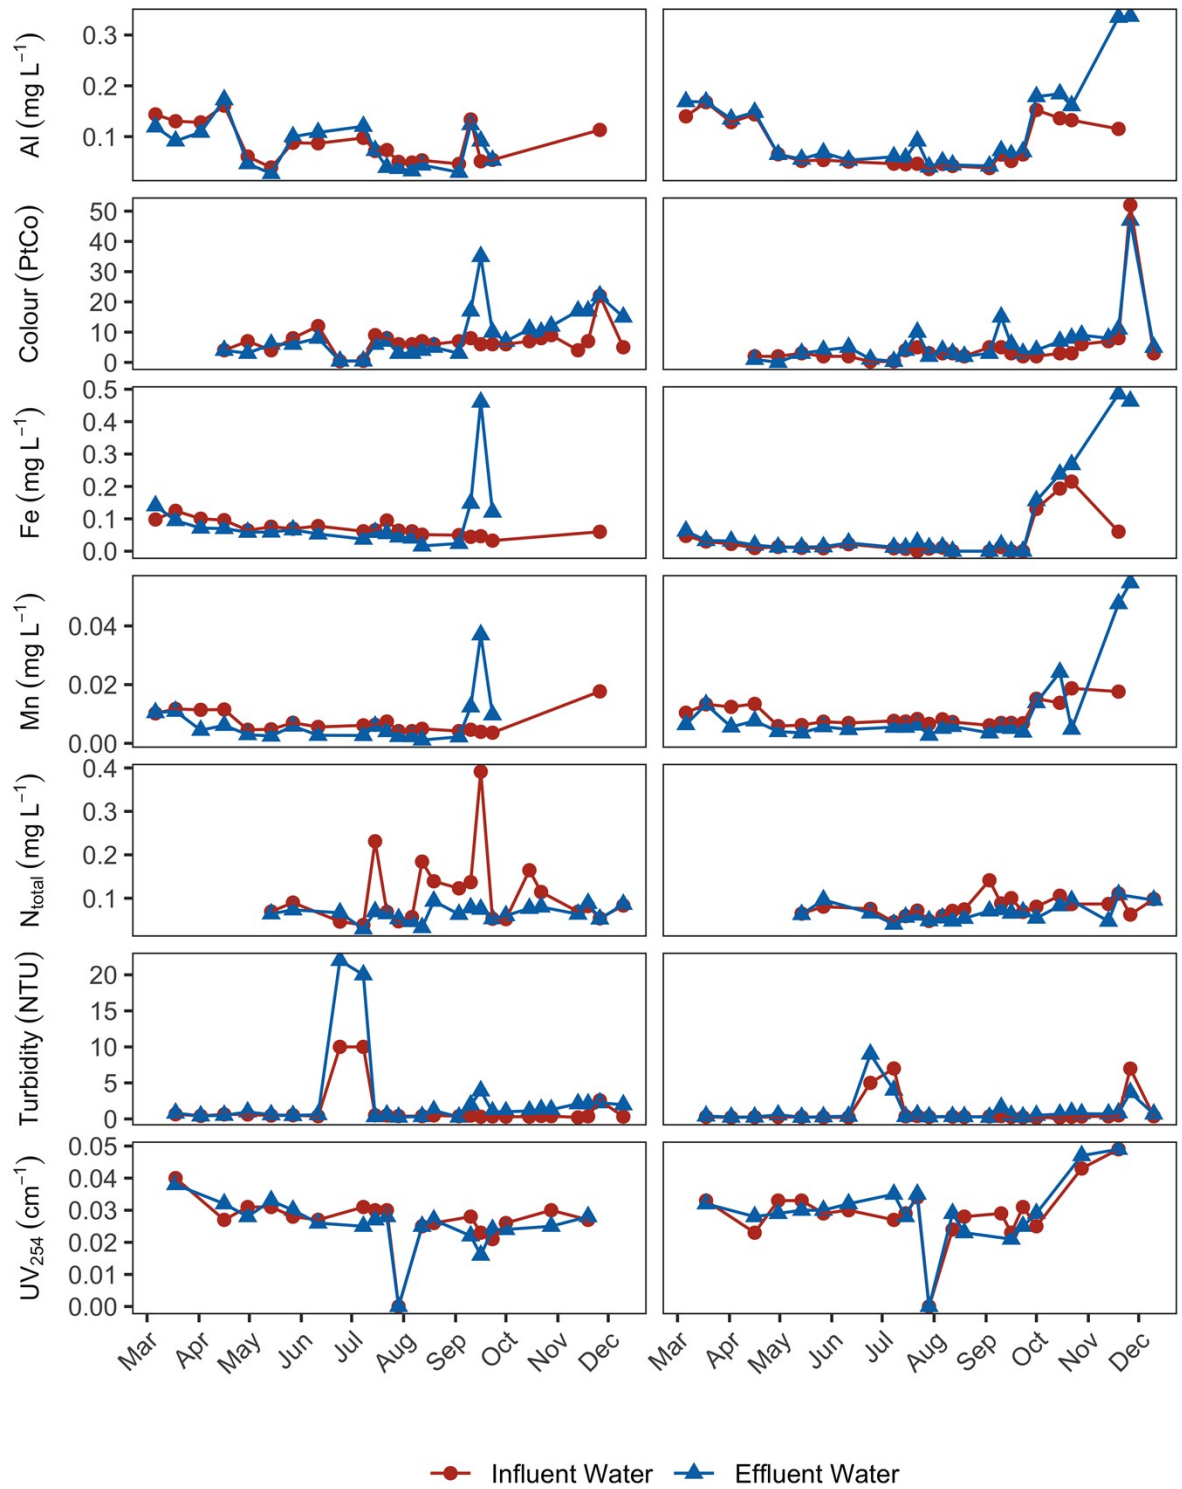

16

17 Figure 2: Aluminum, true colour, iron, manganese, total nitrogen, turbidity, and UV<sub>254</sub>  
 18 measured in the influent (reservoir) and effluent water of each AR.

## 19 **Free chlorine**

20 During the full extent of the study median influent free chlorine concentrations in the  
21 orthophosphate AR were 0.76 mg L<sup>-1</sup> (range: 0.02 - 3.75 mg L<sup>-1</sup>, *n* = 26) and in the  
22 sodium silicate AR were 0.63 L<sup>-1</sup> (range: 0.18 - 1.20 mg L<sup>-1</sup>, *n* = 26). The  
23 orthophosphate-treated system experienced a higher chlorine reduction across the AR,  
24 especially during the July - September quarter (Q2). The corresponding mean free  
25 chlorine reductions during Q2 were 69.6% in the orthophosphate AR, and 24.6% in the  
26 sodium silicate AR.

## 27 **pH**

28 The pH of the influent water samples gathered during the study ranged from a median  
29 of 7.35 (range: 9.03 - 6.78, *n* = 28) for the orthophosphate AR, to 7.63 (range: 8.89 -  
30 6.12, *n* = 28) for the sodium silicate AR. The differences in pH between both systems  
31 were not significantly different at the 95% confidence level. In the sodium silicate-  
32 treated AR there was a noticeable increase in pH at the beginning of Q3 (September -  
33 December) when the sodium silicate dose increased in the pipe loop systems  
34 (September 05, 2019). This effect is explained by the alkaline nature of this type of  
35 corrosion inhibitor.

## 36 **Phosphate and silica residual**

37 The median phosphate residual concentrations in the influent water were stable through  
38 each quarter in contrast with the sodium silicate-treated system, mainly due to the  
39 adjustment to a higher silica residual target from 24 to 48 mg L<sup>-1</sup> in September 05, 2019.  
40 The median phosphate residual concentrations were 0.99 mg L<sup>-1</sup> (range: 1.17 - 0.43 mg  
41 L<sup>-1</sup>, *n* = 25), and the silica residual concentrations were 25.5 mg L<sup>-1</sup> (range: 67.00 -  
42 18.00 mg L<sup>-1</sup>, *n* = 22).

## 43 **Temperature**

44 Influent water temperatures recorded for each reactor system demonstrated seasonal  
45 variation, as expected. Median water temperatures were higher during Q2 (July -  
46 September) within each system, reaching median temperatures of 20.5 and 20.0 °C for

47 the orthophosphate and sodium silicate-treated systems, respectively. The median  
48 influent water temperatures during this study were 18.0 °C (range: 23.00 - 12.00 °C,  $n =$   
49 29) and 17.5 °C (range: 22.50 - 12.00 °C,  $n = 29$ ), respectively.

## 50 Batch Reactors

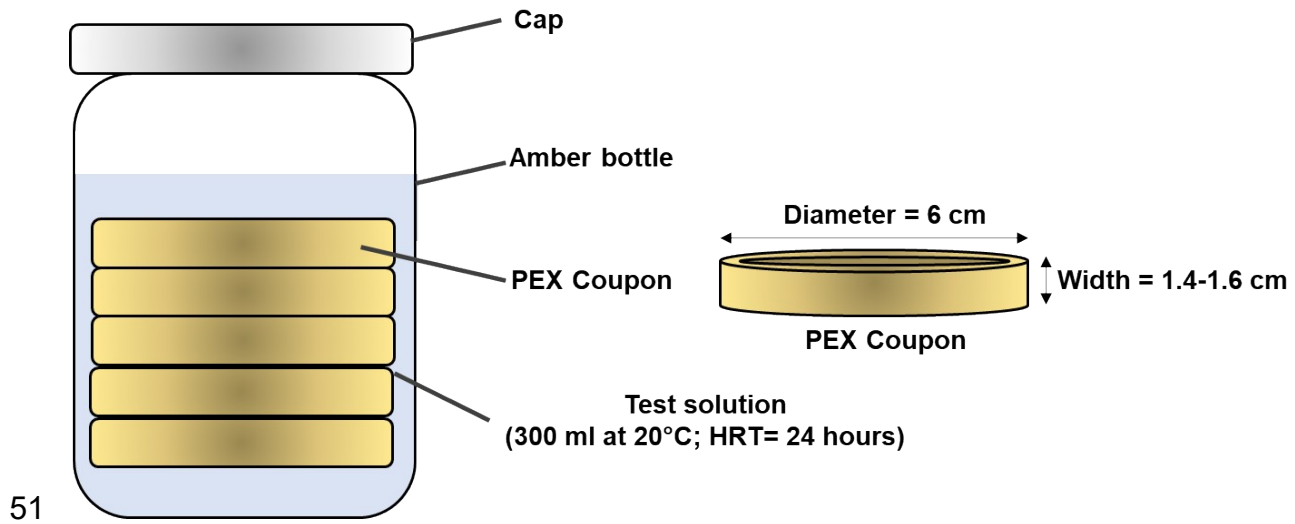

52 *Figure 3: Simplified schematic of the batch reactors.*

## 53 Microbial community structure

### 54 Taxonomic analysis

55 The mayor ASVs identified at the phylum level were *Proteobacteria*, *Bacteroidetes*,  
56 *Firmicutes*, *Actinobacteria*, *Cyanobacteria*, and *Euryarchaeota* (Figure 2). At this phylum  
57 level, the presence of *Proteobacteria* dominated the community structure in both  
58 orthophosphate and sodium silicate-treated systems ( > 74% for every month expect for  
59 November). The presence of *Proteobacteria* was dominant from June to October until a  
60 shift in the bacterial community structure occurred in November 2019, allowing the  
61 identification of *Bacteroidetes*, *Firmicutes*, *Actinobacteria*, *Cyanobacteria*, and  
62 *Euryarchaeota*. A similar presence of organisms at the phylum level have been reported  
63 in drinking water biofilm studies using a variety of substrate materials, including ductile

64 cast-iron, stainless steel, tuberculated cast-iron, and PVC.<sup>1-5</sup> Generally, *Proteobacteria*,  
65 *Firmicutes*, *Actinobacteria*, and *Bacteroidetes* have been associated with the culturable  
66 portion of phosphate treated water on ductile cast-iron and stainless steel coupons;<sup>2</sup> the  
67 same phyla were detected on both orthophosphate and sodium silicates treated cast-  
68 iron systems, however their relative abundance (with the exception of *Proteobacteria*)  
69 was higher in the orthophosphate-treated system.

70 The most noticeable difference at the phylum level between both orthophosphate and  
71 sodium silicate-treated systems is the presence of *Cyanobacteria* from the sodium  
72 silicate system in November, and the detection of *Euryarchaeota* from the  
73 orthophosphate system, also in November. Douterelo *et al.*<sup>1</sup>, reported that  
74 *Cyanobacteria* were positively correlated with TOC levels and was present in plastic  
75 pipes during the winter months (low water temperatures), which may suggest that with  
76 an absence of phosphorus in the sodium silicate-treated system *Cyanobacteria* was  
77 able to assimilate available carbon more effectively.

78 At the genus level the abundance of *Phreatobacter* was higher in the orthophosphate  
79 system (identified from June through December, except for November), than in the  
80 sodium silicate system (Figure 5). According to Perrin *et al.*<sup>5</sup>, the presence of  
81 *Phreatobacter* in drinking water distribution systems is related to warm water  
82 temperatures (>15 °C).

## Phylum Composition

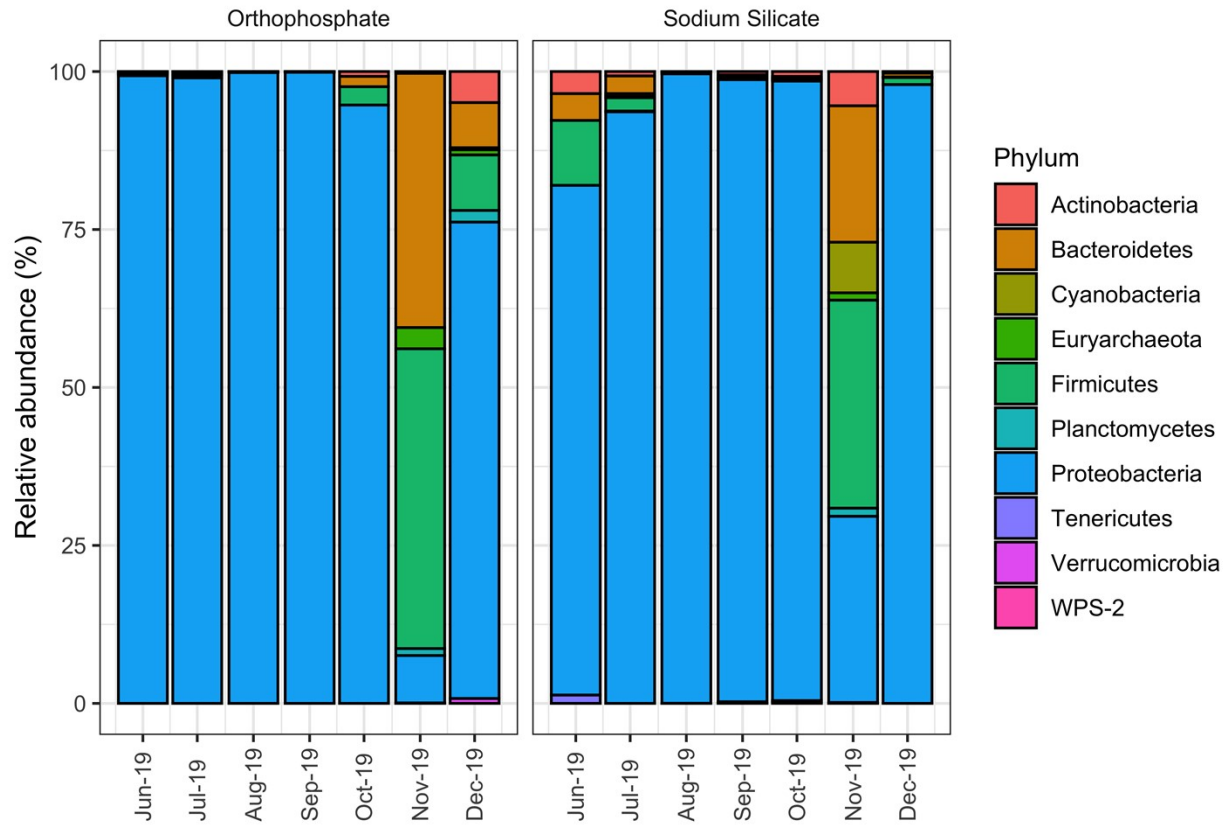

83

84 *Figure 4: Relative abundance at the phylum level of bacterial community structure.*

85

86

87

88

89

90

91

92 *Table 1: Relative abundance (%) summary of genera associated with MOB and*  
 93 *pathogenic bacteria species identified from the sodium silicate and orthophosphate-*  
 94 *treated AR coupons during the months of June - December 2019.*

| Month | Inhibitor | Escherichia-<br>Shigella | Halomonas | Hyphomicrobium | Legionella | Mycobacterium | Sphingomonas |
|-------|-----------|--------------------------|-----------|----------------|------------|---------------|--------------|
| Jun   | P         | -                        | -         | -              | -          | -             | 1.6          |
| Jul   | P         | -                        | 0.1       | 0.2            | -          | 0.2           | 3.2          |
| Aug   | P         | -                        | 0.0       | 0.0            | -          | 0.0           | 10.2         |
| Sep   | P         | 0.0                      | -         | 0.0            | 0.0        | 0.0           | 15.8         |
| Oct   | P         | 0.2                      | 0.6       | 0.2            | -          | 0.4           | 9.6          |
| Nov   | P         | -                        | 7.6       | -              | -          | -             | -            |
| Dec   | P         | 0.1                      | 0.5       | 0.9            | 0.1        | 3.3           | 7.9          |
| Jun   | Si        | 0.2                      | -         | 4.8            | -          | 0.3           | 5.7          |
| Jul   | Si        | -                        | -         | 2.8            | -          | 0.6           | 14.4         |
| Aug   | Si        | -                        | -         | 0.3            | -          | 0.0           | 2.0          |
| Sep   | Si        | -                        | 0.0       | 0.2            | 0.0        | 0.0           | 0.9          |
| Oct   | Si        | -                        | 0.0       | 0.2            | 0.2        | 0.1           | 34.3         |
| Nov   | Si        | 0.6                      | 1.9       | -              | 0.2        | 1.7           | 7.8          |
| Dec   | Si        | -                        | 0.0       | 0.3            | -          | -             | 8.0          |

95

96

97

98

99

100

101

102

103

104



105 *Table 2: Absolute abundances of genera associated with MOB and pathogenic bacteria*  
 106 *species identified from the sodium silicate and orthophosphate-treated AR coupons*  
 107 *during the months of June - December 2019.*

| Month | Inhibitor | Escherichia-Shigella | Halomonas | Hyphomicrobium | Legionella | Mycobacterium | Sphingomonas |
|-------|-----------|----------------------|-----------|----------------|------------|---------------|--------------|
| Jun   | P         | -                    | -         | -              | -          | -             | 843          |
| Jun   | Si        | 22                   | -         | 462            | -          | 33            | 552          |
| Jul   | P         | -                    | 62        | 67             | -          | 80            | 1449         |
| Jul   | Si        | -                    | -         | 577            | -          | 122           | 3001         |
| Aug   | P         | -                    | 21        | 13             | -          | 3             | 17093        |
| Aug   | Si        | -                    | -         | 414            | -          | 26            | 2447         |
| Sep   | P         | 2                    | -         | 13             | 7          | 14            | 32735        |
| Sep   | Si        | -                    | 7         | 58             | 15         | 3             | 305          |
| Oct   | P         | 23                   | 58        | 20             | -          | 42            | 925          |
| Oct   | Si        | -                    | 4         | 116            | 93         | 74            | 20487        |
| Nov   | P         | -                    | 775       | -              | -          | -             | -            |
| Nov   | Si        | 14                   | 43        | -              | 5          | 39            | 175          |
| Dec   | P         | 6                    | 39        | 65             | 9          | 239           | 574          |
| Dec   | Si        | -                    | 6         | 66             | -          | -             | 1591         |

108

109

## 110 Alpha and beta diversity analysis

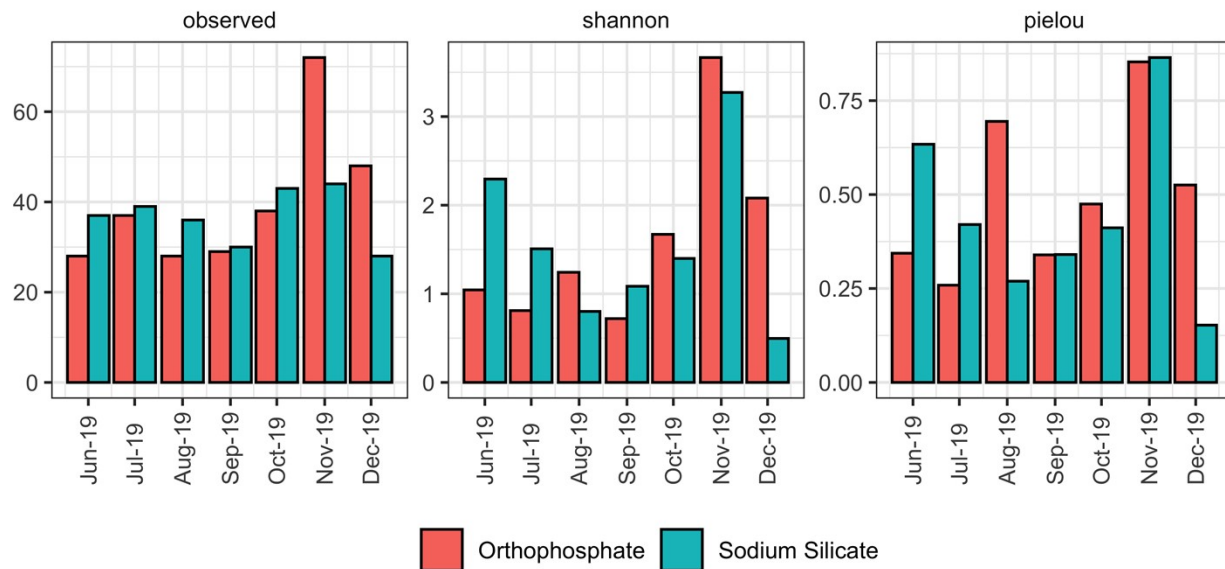

111

112 *Figure 5: Richness, Shannon diversity index, and Pielou evenness index in biofilm*  
113 *samples collected from June to December 2019.*

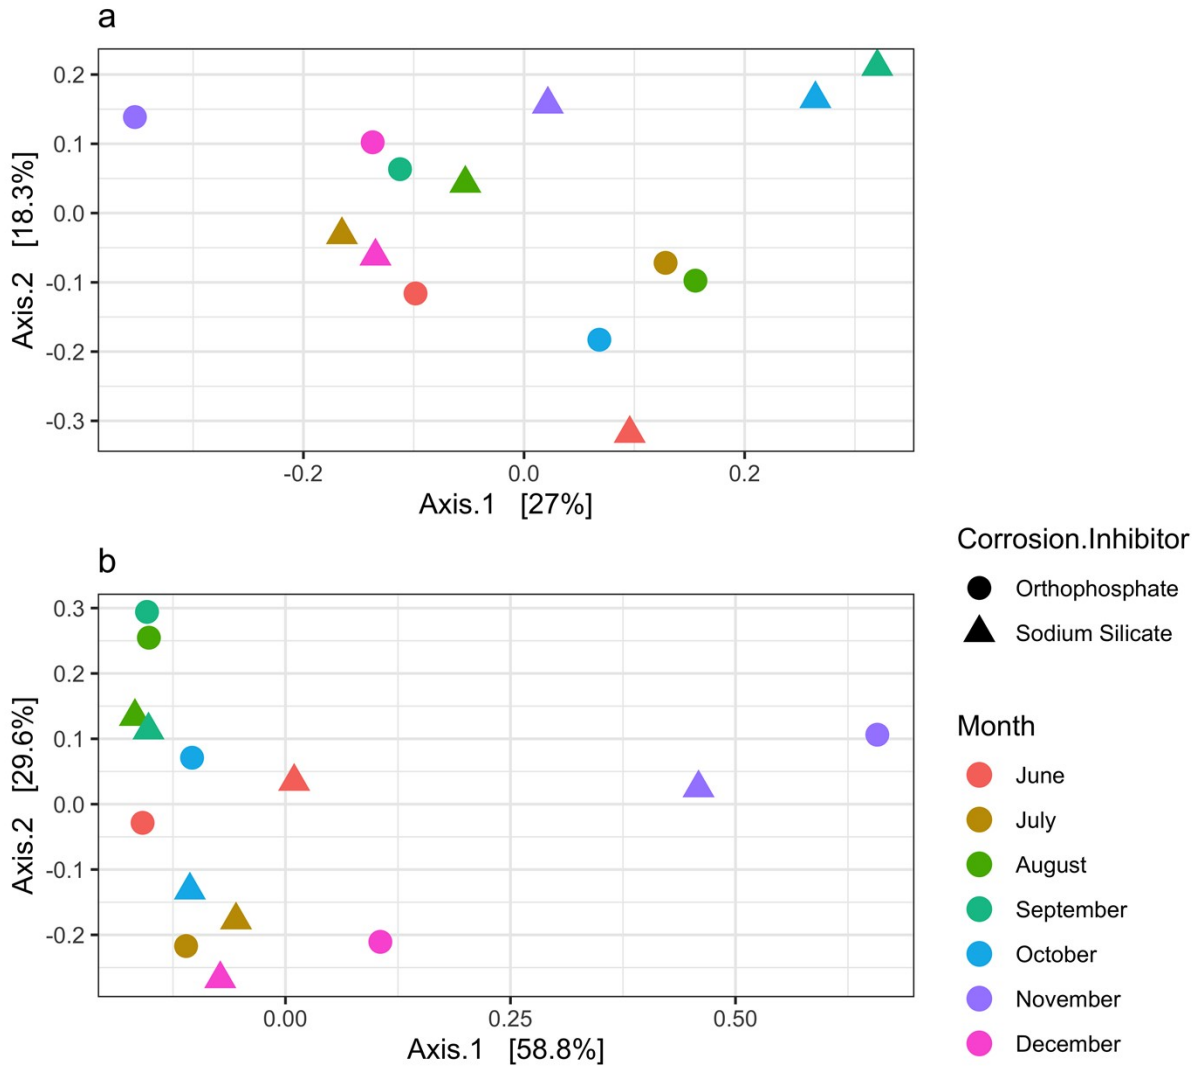

114

115 *Figure 6: (a) Principle coordinate analysis for unweighted and (b) weighted UniFrac*  
 116 *distances.*

117

118

119

## 120 References

- 121 1 I. Douterelo, S. Husband, V. Loza and J. Boxall, Dynamics of biofilm regrowth in  
122 drinking water distribution systems, *Applied and Environmental Microbiology*,  
123 2016, **82**, 4155–4168.
- 124 2 H. J. Jang, Y. J. Choi, H. M. Ro and J. O. Ka, Effects of phosphate addition on  
125 biofilm bacterial communities and water quality in annular reactors equipped with  
126 stainless steel and ductile cast iron pipes, *Journal of Microbiology*, 2012, **50**, 17–  
127 28.
- 128 3 A. C. Martiny, H.-J. Albrechtsen, E. Arvin and S. Molin, Identification of Bacteria  
129 in Biofilm and Bulk Water Samples from a Nonchlorinated Model Drinking Water  
130 Distribution System-Nitrospira.pdf, *Applied and Environmental Microbiology*,  
131 2005, **71**, 8611–8617.
- 132 4 S. J. Payne, G. S. Piorkowski, L. T. Hansen and G. A. Gagnon, Impact of zinc  
133 orthophosphate on simulated drinking water biofilms influenced by lead and  
134 copper, *Journal of Environmental Engineering*, 2016, **142**, 1–9.
- 135 5 Y. Perrin, D. Bouchon, V. Delafont, L. Moulin and Y. Héchar, Microbiome of  
136 drinking water: A full-scale spatio-temporal study to monitor water quality in the  
137 Paris distribution system, *Water Research*, 2019, **149**, 375–385.
